1 **Transcriptome analysis in whole blood reveals increased microbial diversity in schizophrenia**

2  
3

4 **Authors:** Loes M Olde Loohuis<sup>#1</sup>, Serghei Mangul<sup>#2</sup>, Anil PS Ori<sup>1</sup>, Guillaume Jospin<sup>3</sup>, David  
5 Koslicki<sup>4</sup>, Harry Taegyun Yang<sup>2</sup>, Timothy Wu<sup>1</sup>, Marco P Boks<sup>5</sup>, Catherine Lomen-Hoerth<sup>6</sup>,  
6 Martina Wiedau-Pazos<sup>7</sup>, Rita M Cantor<sup>8</sup>, Willem M de Vos<sup>9,10</sup>, René S Kahn<sup>5</sup>, Eleazar Eskin<sup>2</sup>, Roel  
7 A Ophoff<sup>\*,1,5,8</sup>

8

9 **Affiliations:**

10 <sup>1</sup>Center for Neurobehavioral Genetics, Semel Institute for Neuroscience and Human Behavior,  
11 University California Los Angeles, Los Angeles, USA

12 <sup>2</sup>Department of Computer Science, University of California Los Angeles, Los Angeles, USA

13 <sup>3</sup>Davis Genome Center, University of California, Davis, USA

14 <sup>4</sup>Mathematics Department, Oregon State University, Corvallis, USA

15 <sup>5</sup>Department of Psychiatry, Brain Center Rudolf Magnus, University Medical Center Utrecht,  
16 Utrecht, The Netherlands

17 <sup>6</sup>Department of Neurology, University of California San Francisco, San Francisco, USA

18 <sup>7</sup>Department of Neurology, David Geffen School of Medicine, University of California Los  
19 Angeles, Los Angeles, USA

20 <sup>8</sup>Department of Human Genetics, University of California Los Angeles, Los Angeles, USA

21 <sup>9</sup>Laboratory of Microbiology, Wageningen University, Wageningen, The Netherlands

22 <sup>10</sup>Department of Bacteriology and Immunology, Immunobiology Research Program, University  
23 of Helsinki, Helsinki, Finland.

24 \* Correspondence to: Roel A. Ophoff [ophoff@ucla.edu](mailto:ophoff@ucla.edu)

25 # Equal contribution

26 **Key words:** RNA sequencing, microbiome, schizophrenia, unmapped reads, blood

27

28

29

30

31

32

33 **Abstract:**

34 The role of the human microbiome in health and disease is increasingly appreciated. We  
35 studied the composition of microbial communities present in blood across 192 individuals,  
36 including healthy controls and patients with three disorders affecting the brain: schizophrenia,  
37 amyotrophic lateral sclerosis and bipolar disorder. By using high quality unmapped RNA  
38 sequencing reads as candidate microbial reads, we performed profiling of microbial transcripts  
39 detected in whole blood. We were able to detect a wide range of bacterial and archaeal phyla  
40 in blood. Interestingly, we observed an increased microbial diversity in schizophrenia patients  
41 compared to the three other groups. We replicated this finding in an independent  
42 schizophrenia case-control cohort. This increased diversity is inversely correlated with  
43 estimated cell abundance of a subpopulation of CD8<sup>+</sup> memory T cells in healthy controls,  
44 supporting a link between microbial products found in blood, immunity and schizophrenia.

45

## 46 **Introduction**

47           Microbial communities in and on the human body represent a complex mixture of  
48 eukaryotes, bacteria, archaea and viruses. In recent years, mounting evidence has  
49 demonstrated the involvement of the microbiome in human health and disease. In particular,  
50 through the ‘microbiota-gut-brain-axis’ (1, 2), the microbiome has been implicated in complex  
51 psychiatric disorders, including schizophrenia and major depressive disorder(3-8), possibly via  
52 an impact on intestinal permeability(9).

53           High-throughput sequencing offers a powerful culture-independent approach to study  
54 the underlying diversity of microbial communities in their natural habitats across different  
55 human tissues (10) and diseases (3, 11-15). The majority of current microbiome studies use  
56 fecal samples and target 16S ribosomal RNA gene sequencing (16). With the availability of  
57 comprehensive compendia of reference microbial genomes and phylogenetic marker genes  
58 (17), it has become feasible to use non-targeted sequencing data to identify the microbial  
59 species across different human tissues and diseases in a relatively inexpensive and easy way.

60           Other than in cases of sepsis, we currently lack a comprehensive understanding of the  
61 human microbiome in blood, as blood has been generally considered a sterile environment  
62 lacking proliferating microbes (18). However, over the past few decades, this assumption has  
63 been challenged (19, 20), and the presence of a microbiome in the blood has received  
64 increasing attention (21-23).

65           To explore potential connections between the microbiome and diseases of the brain, we  
66 performed a comprehensive analysis of microbial products detected in blood in almost two

67 hundred individuals, including patients with schizophrenia, bipolar disorder and sporadic  
68 amyotrophic lateral sclerosis. These three disease groups represent complex polygenic traits  
69 that affect the central nervous system with largely unknown etiology. Moreover, roles for the  
70 microbiome in all the diseases have been previously hypothesized (5, 24-26). We used available  
71 high quality RNA sequencing (RNA-Seq) reads from whole blood that fail to map to the human  
72 genome as candidate microbial reads for microbial classification. We observed an increased  
73 diversity of microbial communities in schizophrenia patients, and we replicated this finding in  
74 an independent dataset. Careful analyses, including the use of positive and negative control  
75 datasets, suggest that these detected phyla represent true microbial communities in whole  
76 blood and are not present in samples due to contaminants. With the increasing number of RNA-  
77 Seq data sets, our approach may have great potential for application across different tissues  
78 and disease types.

79

80

## 81 **Materials and Methods**

82 A brief description of Materials and Methods follows below; see Supplementary Methods for  
83 the full details.

## 84 **Sample Description**

85 The discovery sample consists of unaffected controls (Controls, n=49) and patients with three  
86 brain-related disorders: schizophrenia (SCZ, n=48), amyotrophic lateral sclerosis (ALS, n=47) and  
87 bipolar disorder (BPD, n=48). The replication sample includes Controls (n=88) and SCZ samples  
88 (n=91). Sample recruitment of the cohorts is described in the Supplementary Methods. All  
89 study methods were approved by the institutional review board of the University of California  
90 at Los Angeles, San Francisco or the Medical Research Ethics Committee of the University  
91 Medical Center Utrecht at The Netherlands. All participants provided written informed consent.

92

## 93 **Sample sequencing**

94 For the discovery sample, RNA-Seq libraries were prepared using Illumina's TruSeq RNA v2  
95 protocol, including ribo-depletion protocol (Ribo-Zero Gold). In total, we obtained 6.8 billion  
96 2x100bp paired-end reads for the primary study ( $35.3M \pm 6.0$  paired-end reads per sample).  
97 The replication sample was processed at the same core facility using the same standardized  
98 procedures as the discovery sample. However, the RNA-Seq libraries were prepared with  
99 poly(A) enrichment, a procedure more selective than the total RNA that was used for the  
100 discovery sample. A total of 3.8 billion reads were obtained ( $26.3M \pm 12.0$ ).

## 101 **Sequence Analysis**

102 We separated human and non-human reads, and use the latter as candidate microbial reads for  
103 taxonomic profiling of microbial communities. To identify potentially microbial reads, we  
104 developed the following pipeline. First, we filtered read pairs and singleton reads mapped to  
105 the human genome or transcriptome. Because total number of reads may affect microbial  
106 profiling, we performed normalization by sub-sampling to 100,000 reads for each sample. Next,  
107 we filtered out low-quality and low-complexity reads using FASTX and SEQCLEAN (see urls).  
108 Finally, the remaining reads were realigned to the human references using the Megablast  
109 aligner (27) in order to exclude any potentially human reads. The remaining reads were used as  
110 candidate microbial reads in subsequent analyses. Figure 1 displays an overview of our pipeline.

## 111 **Taxonomic profiling**

112 To access the assembly and richness of the microbiomial RNA in blood, we used phylogenetic  
113 marker genes to assign the candidate microbial reads to the bacterial and archaeal taxa. We  
114 used PhyloSift (v 1.0.1 with default parameters) to perform taxonomic profiling of the whole  
115 blood samples (17). PhyloSift makes use of a set of protein coding genes found to be relatively  
116 universal (i.e., present in nearly all bacterial and archaeal taxa) and have low variation in copy  
117 number between taxa. Homologs of these genes in new sequence data (e.g., the  
118 transcriptomes used here) are identified and then placed into a phylogenetic and taxonomic  
119 context by comparison to references from sequenced genomes. For our replication study, we  
120 used MetaPhlAn for microbial profiling v.1.7.7(28). MetaPhlAn was run in 2 stages; the first  
121 stage identifies the candidate microbial reads (i.e., reads hitting a marker) and the second stage

122 profiles meta-genomes in terms of relative abundances. We used MetaPhlAn, rather than  
123 PhyloSift, due to differences in library preparation (polyA enrichment versus Ribo-Zero); there  
124 were an insufficient number of reads matching the database of the marker genes curated by  
125 PhyloSift for adequate microbial profiling of the replication sample.

126

### 127 **Estimating Microbial diversity**

128 Microbial diversity, or alpha diversity, within each sample was determined using the inverse  
129 Simpson index. This index simultaneously assesses both richness (corresponding to the number  
130 of distinct taxa) and relative abundance of the microbial communities within each sample (29).  
131 In particular, it enables effective differentiation between the microbial communities shaped by  
132 the dominant taxa and the communities with many taxa with even abundances (30) (*asbio* R  
133 package). To measure sample-to-sample dissimilarities between microbial communities, we use  
134 Bray-Curtis beta diversity index, which accounts for both changes in the abundances of the  
135 shared taxa and for taxa uniquely present in one of the samples (*vegan* R package). Higher beta  
136 diversity indicates higher level of dissimilarity between microbial communities, providing a link  
137 between diversity at local scales (alpha diversity) and the diversity corresponding to total  
138 microbial richness of the subject group (gamma diversity (31)).

139

### 140 **Statistical analysis of microbiome diversity**

141 To test for differences in alpha diversity between disease groups, we fit an analysis of  
142 covariance (ANCOVA) model using normalized values of alpha, including sex and age, and

143 technical covariates (RNA INtegrity value (RIN), batch, flow cell lane and RNA concentration)  
144 into the model. Bonferroni correction for multiple testing was used. To determine the relative  
145 effect size of alpha diversity on schizophrenia status, we fit a logistic regression model including  
146 the same covariates and measure reduction in  $R^2$  comparing the full logistic regression model  
147 versus a reduced model with alpha removed. Analysis of beta diversity was performed  
148 analogously (see Supplementary Methods).

### 149 **Reference-free microbiome analysis**

150 We complement the reference-based taxonomic analysis with a reference independent  
151 analysis. We use EMDeBruijn (<https://github.com/dkoslicki/EMDeBruijn>), a reference-free  
152 approach capable of quantifying differences in microbiome composition between the samples.  
153 EMDeBruijn compresses the k-mer counts of two given samples onto de Bruijn graphs and then  
154 measures the minimal cost of transforming one of these graphs into the other. To determine  
155 overlap between the results from PhyloSift and EMdeBruin, we correlated principal  
156 components of EMdeBruin and PhyloSift by Spearman rank correlation, including all samples.

157

### 158 **Estimation of cell proportions in whole blood**

159 We assessed DNA methylation data from 65 controls taken from our replication sample, and we  
160 compared methylation-derived blood cell proportions estimated using Houseman's estimation  
161 method (32, 33) to alpha diversity after adjusting for age, gender, RIN and all technical  
162 parameters. We tested whether alpha diversity levels are associated with cell type abundance  
163 estimates. More details on the method, quality control pipeline of the methylation data and  
164 statistical analysis can be found in Supplementary Methods.



## 165 Results

### 166 Studying microbial RNA in blood

167 To study the composition of microbial RNA in blood, we determined the microbial meta-  
168 transcriptome present in the blood of unaffected controls (Controls, n=49) and patients with  
169 three brain-related disorders: schizophrenia (SCZ, n=48), amyotrophic lateral sclerosis (ALS,  
170 n=47) and bipolar disorder (BPD, n=48) (Figure 1, Table 1).

171 *[Figure 1 about here]*

172 *[Table 1 about here]*

173

174 Using our filtering pipeline, an average of 33,546 of 100,000 unmapped reads are identified as  
175 high quality, unique non-host reads and were used as candidate microbial reads in our analyses.  
176 From these, PhyloSift was able to assign an average of 1,235 reads ( $1.24\% \pm 0.41\%$ , mean  $\pm$   
177 standard deviation) to the bacterial and archaeal gene families. A total of 1,880 taxa were  
178 assigned, with 23 taxa at the phylum level (Figure 2). Most of the taxa we observed derived  
179 from bacteria (relative genomic abundance  $89.8\% \pm 7.4\%$ ), and a smaller portion derived from  
180 archaea (relative genomic abundance  $12.28\% \pm 6.4\%$ ).

181 *[Figure 2 about here]*

182 In total, we observed 23 distinct microbial phyla with on average  $4.1 \pm 2.0$  phyla per  
183 individual. The large majority of taxa observed in our sample is not universally present in all  
184 individuals; the single exception is Proteobacteria, which dominates all samples with  $73.4\% \pm$   
185  $18.3\%$  relative abundance (Figure 2 dark green color). Several bacterial phyla show a broad

186 prevalence across individuals and disorders (present in 1/4 of the samples of each subject  
187 group). Those phyla include Proteobacteria, Firmicutes and Cyanobacteria, with relative  
188 abundance  $73.4\% \pm 18.3\%$ ,  $14.9 \pm 10.9\%$ , and  $11.0\% \pm 8.9\%$  (Table S2). This is in line with recent  
189 published work on the blood microbiome using 16S targeted metagenomic sequencing  
190 reporting relative abundance of 80.4-87.4% and 3.0-6.4% for Proteobacteria and Firmicutes,  
191 respectively (23). The other two phyla identified in this study (Actinobacteria and  
192 Bacteroidetes) were also detected in our sample in more than 25 individuals. Although  
193 Proteobacteria and Firmicutes, are commonly associated with the human microbiome (34),  
194 some members of these phyla might be associated with reagent and environmental  
195 contaminants (35, 36).

196 To validate our pipeline and investigate the possibility of contamination introduced  
197 during RNA isolation, library preparation and sequencing steps, we performed both negative  
198 and positive control experiments (see Supplementary Results and Methods for details). In brief:  
199 no microbiome sequences were detected in transcriptome data in lymphoblast cell lines  
200 (negative control), and we only detected the Chlamydiae phylum in RNA-Seq from cells infected  
201 with Chlamydiae (positive control). We examined experimental procedures and technical  
202 parameters on microbial composition, and we observed no link between the presence of  
203 microbial communities and possible confounders.

204 To compare the inferred microbial composition found in blood with that in other body  
205 sites, we used taxonomic composition of 499 meta-genomic samples from Human Microbiome  
206 Project (HMP) obtained by MetaPhlAn or five major body habitats (gut, oral, airways, and skin)  
207 (10). Of the 23 phyla discovered in our sample, 15 were also found in HMP samples, of which 13

208 are confirmed by at least ten samples. Our data suggest that the predominant phyla detected in  
209 blood are most closely related to the known oral and gut microbiome (Table S2). Comparing the  
210 microbial composition of whole blood with the microbiome detected in atherosclerotic plaques  
211 (37), we observe that the four phyla that together make up for >97% of the microbiome in  
212 plaques are also identified in our sample (Firmicutes, Bacteroidetes, Proteobacteria,  
213 Actinobacteria).

214 Finally, it should be noted that the sequencing technology does not allow for  
215 identification of the origin of microbial RNA. That is, we can not distinguish whether the  
216 observed microbial signatures in blood are originate from bacterial communities actually  
217 present in the blood, or whether the RNA crossed into the blood stream from elsewhere.

218

### 219 **Increased microbial diversity in schizophrenia samples**

220 To evaluate potential differences in microbial profiles of individuals with the different disorders  
221 (SCZ, BPD, ALS) and unaffected controls, we explored the composition and richness of the  
222 microbial communities across the groups.

223 We observed increased alpha diversity in schizophrenia samples compared to all other  
224 groups (*ANCOVA*  $P < 0.005$  for all groups, Figure 3a, Table 2 and Table S5, *Bonferroni*  
225 correction). These differences are corrected for covariates and are independent of potential  
226 confounders, such as experimenter and RNA extraction run (Figure S1 and S2), and they are not  
227 the consequence of a different number of reads being detected as microbial in schizophrenia  
228 samples (see Supplementary Results). No significant differences were observed between the

229 three remaining groups (BPD, ALS, Controls). In our sample, alpha diversity was found to be a  
230 significant predictor of schizophrenia status and explained 5.0% of the variation as measured by  
231 reduction in Nagelkerke's  $R^2$  from logistic regression. We observe no correlation between  
232 polygenic risk scores (39) and alpha diversity in our schizophrenia sample ( $n=32$ , Kendall's tau=  
233 0.008,  $P=0.96$ , Supplementary Methods). We also did not observe differences in alpha  
234 diversity between sexes or across ages, nor are our results driven by the relatively younger  
235 schizophrenia cohort (Supplementary Results). Alpha diversity at other main taxonomic ranks  
236 yields a similar pattern of increased diversity in schizophrenia (Figure S3).

237 The increased diversity observed in schizophrenia patients may be due to specific phyla  
238 characteristic to schizophrenia, or due to a more general increased microbial diversity in people  
239 affected by the disease. To investigate this, we compared diversity across individuals within the  
240 schizophrenia group to control samples. We compared beta diversity across pairs of samples  
241 with schizophrenia and controls, resulting in three subject groups: SCZ\_Controls, SCZ\_SCZ and  
242 Controls\_Controls. The lowest diversity was observed in the Controls\_Controls group ( $0.43 \pm$   
243  $0.21$ ), followed by SCZ\_SCZ ( $0.50 \pm 0.14$ ), and the highest beta diversity values were observed  
244 for SCZ\_Controls ( $0.51 \pm 0.17$ ) ( $P < 0.05$  for each comparison, by ANCOVA after correcting for  
245 three tests). This result was confirmed by permanova ( $P < 0.001$ ) based on 1,000 permutations.  
246 Thus, the observed increased alpha diversity in schizophrenia is not caused by a particular  
247 microbial profile, but most likely represents a non-specific overall increased microbial burden  
248 (see also Figure S4 and Supplementary Results).

249 In addition to measuring individual microbial diversity (alpha), and diversity between  
250 individuals (beta), we measured the total richness of the microbiome by the total number of

251 distinct taxa of the microbiome community observed within an entire subject group (gamma  
252 diversity (40)). We observed that all 23 distinct phyla are observed in schizophrenia:  
253  $\gamma(\text{SCZ})=23$  compared to  $\gamma(\text{Controls})=20$ ,  $\gamma(\text{ALS})=16$  and  $\gamma(\text{BPD})=18$ .

254 We complemented reference-based methods (PhyloSift and MetaPhlAn) with  
255 EMDeBruijn, a reference-independent method. EMDeBruin distances measured between  
256 samples correlated significantly with beta diversity (Spearman rank  $P < 2.2e-16$ ,  $\rho = 0.37$ ,  
257 including SCZ and Controls). Also, EMDeBruijn PCs correlated with principal components  
258 obtained from edge PCA based on the PhyloSift taxonomic classification (correlation between  
259 EMDeBruijn PC1, and PhyloSift PC1 is  $P = 1.824e-09$ ; Spearman rank correlation is  $\rho = -0.42$ ;  
260 see also Figure S5). After correcting covariates, the first three EMDeBruijn PCs are significant  
261 predictors of schizophrenia status, and jointly explained 7.1% of the variance ( $P < 0.05$  for each  
262 PC).

263 *[Figure 3 about here]*

264 *[Table 2 about here]*

### 265 **Group differences of individual phyla**

266 In addition to a global difference between schizophrenia and the other groups, we also  
267 investigated whether there are particular individual phyla contributing to the differences  
268 between schizophrenia and other groups. There are two phyla detected more often in  
269 schizophrenia cases versus all the other groups: Plactomycetes, observed in 20 SCZ cases  
270 compared to 3(ALS) 2(BPD) 5(Controls) ( $P = 0.0002$  Fisher's exact for four groups, Bonferroni

271 corrected for 23 tests  $P=0.0057$ ) and Thermotogae, observed in 20 SCZ cases compared to 6  
272 ALS, 3 BPD and 6 Controls ( $P= 0.0006$  Fisher's exact, corrected  $P=0.014$ ). No outliers were  
273 observed for the other groups (see Table S7).

274

## 275 **Replication**

276 We performed a replication experiment in an independent case-control sample: schizophrenia  
277 (SCZ  $n=91$ ) and healthy controls (Controls  $n=88$ ) (See Table S1.D). MetaPhlAn was able to assign  
278 5,174 reads ( $0.089\% \pm 0.039\%$ , mean  $\pm$  standard deviation) on average to the bacterial gene  
279 families.

280 Schizophrenia samples showed increased alpha diversity on genus level ( $2.73 \pm 0.77$  for  
281 cases, versus  $2.32 \pm 0.57$  for controls, corrected  $P = 0.003$  Figure 3b) and explained 2.5% of  
282 variance as measured by reduction in Nagelkerke  $R^2$ , thus replicating our main finding of  
283 increased diversity in schizophrenia. While our original analysis was performed on the phylum  
284 level, in our discovery sample we observe a similar increase of diversity at the genus level (see  
285 Figure S3). Similar to our discovery cohort, we observed no significant correlation between  
286 alpha diversity and age or differences across gender. Beta diversity and EMDeBruijn analyses  
287 also show similar, though not identical, patterns of nonspecific increased diversity in  
288 schizophrenia samples (Supplementary Results).

289

## 290 **Cell type composition and diversity**

291 We hypothesized that differences in microbial diversity may be linked to whole blood cell type  
292 composition. Our analysis shows that the proportion of one cell type, CD8<sup>+</sup> CD28<sup>-</sup> CD45RA<sup>-</sup> cells,  
293 is significantly negatively correlated with alpha diversity after correction for all other cell-count  
294 estimates as estimated from whole blood DNA methylation data (correlation = -0.41, P=7.3e-4,  
295 n= 65 Controls from the Replication study, Figure S6, Table S6). These cells are T cells that lack  
296 CD8<sup>+</sup> naïve cell markers CD28 and CD45RA and are thought to represent a subpopulation of  
297 CD8<sup>+</sup> memory T cells (41, 42). We observed that low alpha diversity correlates with high levels  
298 of cell abundance of this population of T cells.

299

300

## 301 **Discussion**

302 We used high throughput RNA sequencing from whole blood to perform microbiome profiling  
303 and identified an increased diversity in schizophrenia patients.

304 While other studies of human microbiome using RNA-Seq have been conducted (43, 44),  
305 this is the first assessing the microbiome from whole blood by using unmapped non-human  
306 reads. Despite the fact that transcripts are present at much lower fractions than human reads,  
307 we were able to detect microbial transcripts from bacteria and archaea in almost all samples.  
308 The microbes found in blood are thought to be originating from the gut as well as oral cavities  
309 (45, 46), which is in line with our finding that the microbial profiles found in our study most  
310 closely resemble the gut and oral microbiome as profiled by the HMP (10). The taxonomic  
311 profile of the cohort samples suggests the prevalence of the several phyla, Proteobacteria,  
312 Firmicutes and Cyanobacteria, across individuals and different disorders included in our study.

313 This is in line with a recent study that used 16S targeted meta-genomic sequencing, which  
314 reported Proteobacteria and Firmicutes among the most abundant phyla detected in blood  
315 (23).

316 Rigorous quality control is critically important for any high-throughput sequencing  
317 project, especially in the context of studying the microbiome (35). To this end, we performed  
318 both negative and positive quality control experiments, and we carefully evaluated possible  
319 contamination effects introduced during the experiments. Our results suggest that the detected  
320 phyla represent true microbial communities in whole blood and are not due to contaminants.  
321 However, it should be noted that whether only the microbial products crossed into the  
322 bloodstream or whether the microbes themselves are present in blood cannot be answered  
323 using sequencing techniques. Future experiments, for example, using microscopy, culturing or  
324 direct measures of gut permeability, may be able to shed light on this question.

325

326 The most striking finding of our study that relates to diseases affecting the central  
327 nervous system is the increased microbial alpha diversity in schizophrenia patients compared to  
328 controls and the other two disease groups (ALS, BPD). We replicate this finding in an  
329 independent cohort of schizophrenia cases and controls. The replication experiment, while  
330 based on different library preparation (Ribo-Zero versus Poly(A)), provides strong evidence for  
331 an increased alpha diversity of the microbiome detected in blood in schizophrenia and explains  
332 roughly 5% of disease variation. We not only observe an increased individual microbial  
333 diversity, but also an increased diversity between individuals (Beta diversity) with schizophrenia  
334 compared to controls, rendering it unlikely that a single phylum or microbial profile is causing



335 the disease-specific increase in diversity. Nevertheless, in our study we observed that two phyla  
336 in particular, Planctomycetes and Thermotogae, were present in significantly more  
337 schizophrenia samples when compared to the other groups. Interestingly, Planctomycetes is  
338 group of gram-negative bacteria closely related to Verrucomicrobia and Chlamydiae; together  
339 these comprise the Planctomycetes-Verrucomicrobia-Chlamydiae superphylum (47). From  
340 peripheral blood, infection with Chlamydiaceae species has been reported to be increased in  
341 schizophrenia (40%) compared to controls (7%) (48). Since Chlamydiae is one of the taxa of the  
342 superphylum, it is possible that the increase in Planctomycetes we observe is related to the  
343 observed increase in Chlamydiaceae species. As the collection of available reference genomes  
344 continues to grow and improve, future studies are needed to corroborate and refine these  
345 findings.

346 For the study of microbiome diversity, we employed reference-based methods  
347 (PhyloSift and MethPhlAn) and the EMDebruin method, a purely reference-agnostic approach.  
348 The latter showed strong correspondence to both reference-based methods, highlighting the  
349 value of this unbiased sequence-based analysis for investigating microbial differences across  
350 groups. However, in addition to differences in distribution of microbial transcripts, EMDebruin  
351 may capture variation of other, yet unknown, origin.

352 In addition to our observation that microbial diversity is more generally increased in  
353 schizophrenia, our study demonstrates the value of analyzing non-human reads present in the  
354 RNA-Seq data to study the microbial composition of a tissue of interest (49, 50). The RNA-Seq  
355 approach avoids biases introduced by primers in targeted 16S ribosomal RNA gene profiling. In  
356 addition, since *mRNA stability is low in prokaryotes*, RNA-Seq might offer a potential advantage

357 of avoiding contamination of genomic DNA by dead cells compared to genome sequencing (51).  
358 Given the many large-scale RNA-Seq datasets that are becoming available, we anticipate that  
359 high-throughput meta-transcriptome-based microbiome profiling will find broad applications as  
360 a hypothesis-generating tool in studies across different tissues and disease types.

361

362 The increased microbial diversity observed in schizophrenia could be part of the disease  
363 etiology (i.e., causing schizophrenia) or may be a secondary effect of disease status. In our  
364 sample, we observed no correlation between increased microbial diversity and genetic risk for  
365 schizophrenia as measured by polygenic risk scores (52). In addition, it is remarkable that  
366 bipolar disorder, which is genetically and clinically correlated to schizophrenia (53), does not  
367 show a similar increased diversity. We did observe a strong inverse correlation between  
368 increased diversity and estimated cell abundance of a population of T-cells in healthy controls.  
369 Even though this finding is based on indirect cell count measures using DNA methylation data  
370 (41), the significant correlation highlights a likely close connection between the immune system  
371 and the blood microbiome, a relationship that has been documented before (54). More  
372 extensive cell count measures and/or better markers of immune sensing of microbial products  
373 could be used to study this relationship more directly. In the absence of a direct link with  
374 genetic susceptibility and the reported correlation with the immune system, we hypothesize  
375 that the observed effect in schizophrenia may be mostly a consequence of disease. This may be  
376 affected by lifestyle and/or health status differences of schizophrenia patients, including  
377 smoking, treatment plans, (chronic) infection, GI status, the use of probiotics, antibiotics and  
378 other drug use or other environmental exposures. Future targeted and/or longitudinal studies

379 with larger sample sizes, detailed clinical phenotypes and more in-depth sequencing are  
380 needed to corroborate this hypothesis. Another interesting direction for future work is to study  
381 gut permeability in the context of our findings more directly. For example, how does damage to  
382 the gut (such as measured using I-FABP) affect observed microbial diversity in blood? These  
383 studies would likely result in an expanded understanding of the functional mechanisms  
384 underlying the connection between the human immune system, microbiome, and disease  
385 etiology. In particular, we hope that these future efforts will provide a useful quantitative and  
386 qualitative assessment of the microbiome and its role across the gut-blood barrier in the  
387 context of psychiatric disorders.

388

389

390 **Availability of Data and Materials:**

391 The data discussed in this publication have been deposited in NCBI's Gene Expression Omnibus  
392 (55) and are accessible through GEO Series accession number GSE80974  
393 (<https://www.ncbi.nlm.nih.gov/geo/query/acc.cgi?acc=GSE80974>).

394

395 **Acknowledgments:**

396 This work is supported by NIH/NIMH R01 5R01MH090553 (BP samples), 5R01NS058980 (ALS  
397 samples) and R01MH078075 (SCZ, Control samples), R21MH098035 (replication sample)  
398 awarded to R.A.O. L.M.O.L was financially supported by the National Institute of Neurological  
399 Disorders And Stroke of the National Institutes of Health under Award Number T32NS048004.

400 The authors thank Dr. Jonathan Eisen for helpful discussions and insights throughout the course  
401 of this project. We thank Dr. Lana Martin for helpful edits to the manuscript. Finally, we thank  
402 the study subjects for their participation.

403

404 **Financial Declarations:**

405 The authors have no conflicts of interest to declare.

406

407

## 408 **References and Notes**

- 409 1. Clarke G, Grenham S, Scully P, Fitzgerald P, Moloney RD, Shanahan F, et al. The  
410 microbiome-gut-brain axis during early life regulates the hippocampal serotonergic system in a  
411 sex-dependent manner. *Mol Psychiatry*. 2013;18(6):666-73.
- 412 2. Cryan JF, Dinan TG. Mind-altering microorganisms: the impact of the gut microbiota on  
413 brain and behaviour. *Nat Rev Neurosci*. 2012;13(10):701-12.
- 414 3. Hsiao EY, McBride SW, Hsien S, Sharon G, Hyde ER, McCue T, et al. Microbiota  
415 modulate behavioral and physiological abnormalities associated with neurodevelopmental  
416 disorders. *Cell*. 2013;155(7):1451-63.
- 417 4. Erny D, Hrabec de Angelis AL, Jaitin D, Wieghofer P, Staszewski O, David E, et al. Host  
418 microbiota constantly control maturation and function of microglia in the CNS. *Nat Neurosci*.  
419 2015;18(7):965-77.
- 420 5. Foster JA, McVey Neufeld KA. Gut-brain axis: how the microbiome influences anxiety  
421 and depression. *Trends Neurosci*. 2013;36(5):305-12.
- 422 6. Castro-Nallar E, Bendall ML, Perez-Losada M, Sabuncyan S, Severance EG, Dickerson  
423 FB, et al. Composition, taxonomy and functional diversity of the oropharynx microbiome in  
424 individuals with schizophrenia and controls. *PeerJ*. 2015;3:e1140.
- 425 7. Rogers GB, Keating DJ, Young RL, Wong ML, Licinio J, Wesselingh S. From gut  
426 dysbiosis to altered brain function and mental illness: mechanisms and pathways. *Mol*  
427 *Psychiatry*. 2016;21(6):738-48.
- 428 8. Zheng P, Zeng B, Zhou C, Liu M, Fang Z, Xu X, et al. Gut microbiome remodeling  
429 induces depressive-like behaviors through a pathway mediated by the host's metabolism. *Mol*  
430 *Psychiatry*. 2016;21(6):786-96.
- 431 9. Kelly JR, Kennedy PJ, Cryan JF, Dinan TG, Clarke G, Hyland NP. Breaking down the  
432 barriers: the gut microbiome, intestinal permeability and stress-related psychiatric disorders.  
433 *Front Cell Neurosci*. 2015;9:392.
- 434 10. Human Microbiome Project C. Structure, function and diversity of the healthy human  
435 microbiome. *Nature*. 2012;486(7402):207-14.
- 436 11. Turnbaugh PJ, Ley RE, Mahowald MA, Magrini V, Mardis ER, Gordon JI. An obesity-  
437 associated gut microbiome with increased capacity for energy harvest. *Nature*.  
438 2006;444(7122):1027-31.
- 439 12. Turnbaugh PJ, Hamady M, Yatsunenko T, Cantarel BL, Duncan A, Ley RE, et al. A core  
440 gut microbiome in obese and lean twins. *Nature*. 2009;457(7228):480-4.
- 441 13. Abu-Shanab A, Quigley EM. The role of the gut microbiota in nonalcoholic fatty liver  
442 disease. *Nature reviews Gastroenterology & hepatology*. 2010;7(12):691-701.
- 443 14. Cho I, Blaser MJ. The human microbiome: at the interface of health and disease. *Nature*  
444 *reviews Genetics*. 2012;13(4):260-70.
- 445 15. Greenblum S, Turnbaugh PJ, Borenstein E. Metagenomic systems biology of the human  
446 gut microbiome reveals topological shifts associated with obesity and inflammatory bowel  
447 disease. *Proc Natl Acad Sci U S A*. 2012;109(2):594-9.
- 448 16. de Vos WM, de Vos EA. Role of the intestinal microbiome in health and disease: from  
449 correlation to causation. *Nutrition reviews*. 2012;70 Suppl 1:S45-56.
- 450 17. Darling AE, Jospin G, Lowe E, Matsen FAt, Bik HM, Eisen JA. PhyloSift: phylogenetic  
451 analysis of genomes and metagenomes. *PeerJ*. 2014;2:e243.
- 452 18. Drennan MR. What is "Sterile Blood"? *British Medical Journal*. 1942;2(4269):526-.

- 453 19. McLaughlin RW, Vali H, Lau PC, Palfree RG, De Ciccio A, Sirois M, et al. Are there  
454 naturally occurring pleomorphic bacteria in the blood of healthy humans? *J Clin Microbiol.*  
455 2002;40(12):4771-5.
- 456 20. Nikkari S, McLaughlin IJ, Bi W, Dodge DE, Relman DA. Does blood of healthy subjects  
457 contain bacterial ribosomal DNA? *J Clin Microbiol.* 2001;39(5):1956-9.
- 458 21. Amar J, Serino M, Lange C, Chabo C, Iacovoni J, Mondot S, et al. Involvement of tissue  
459 bacteria in the onset of diabetes in humans: evidence for a concept. *Diabetologia.*  
460 2011;54(12):3055-61.
- 461 22. Sato J, Kanazawa A, Ikeda F, Yoshihara T, Goto H, Abe H, et al. Gut dysbiosis and  
462 detection of "live gut bacteria" in blood of Japanese patients with type 2 diabetes. *Diabetes Care.*  
463 2014;37(8):2343-50.
- 464 23. Paise S, Valle C, Servant F, Courtney M, Burcelin R, Amar J, et al. Comprehensive  
465 description of blood microbiome from healthy donors assessed by 16S targeted metagenomic  
466 sequencing. *Transfusion.* 2016.
- 467 24. Wu S, Yi J, Zhang YG, Zhou J, Sun J. Leaky intestine and impaired microbiome in an  
468 amyotrophic lateral sclerosis mouse model. *Physiol Rep.* 2015;3(4).
- 469 25. Dinan TG, Borre YE, Cryan JF. Genomics of schizophrenia: time to consider the gut  
470 microbiome? *Mol Psychiatry.* 2014;19(12):1252-7.
- 471 26. Dickerson F, Severance E, Yolken R. The microbiome, immunity, and schizophrenia and  
472 bipolar disorder. *Brain Behav Immun.* 2016.
- 473 27. Camacho C, Coulouris G, Avagyan V, Ma N, Papadopoulos J, Bealer K, et al. BLAST+:  
474 architecture and applications. *BMC bioinformatics.* 2009;10:421.
- 475 28. Segata N, Waldron L, Ballarini A, Narasimhan V, Jousson O, Huttenhower C.  
476 Metagenomic microbial community profiling using unique clade-specific marker genes. *Nature*  
477 *methods.* 2012;9(8):811-4.
- 478 29. Simpson EH. Measurement of diversity. *Nature.* 1949.
- 479 30. Whittaker RH. Evolution and measurement of species diversity. *Taxon.* 1972:213-51.
- 480 31. Koleff P, Gaston KJ, Lennon JJ. Measuring beta diversity for presence-absence data.  
481 *Journal of Animal Ecology.* 2003;72(3):367-82.
- 482 32. Houseman EA, Accomando WP, Koestler DC, Christensen BC, Marsit CJ, Nelson HH, et  
483 al. DNA methylation arrays as surrogate measures of cell mixture distribution. *BMC*  
484 *bioinformatics.* 2012;13:86.
- 485 33. Aryee MJ, Jaffe AE, Corrada-Bravo H, Ladd-Acosta C, Feinberg AP, Hansen KD, et al.  
486 Minfi: a flexible and comprehensive Bioconductor package for the analysis of Infinium DNA  
487 methylation microarrays. *Bioinformatics.* 2014;30(10):1363-9.
- 488 34. Human Microbiome Project C. A framework for human microbiome research. *Nature.*  
489 2012;486(7402):215-21.
- 490 35. Salter SJ, Cox MJ, Turek EM, Calus ST, Cookson WO, Moffatt MF, et al. Reagent and  
491 laboratory contamination can critically impact sequence-based microbiome analyses. *BMC Biol.*  
492 2014;12:87.
- 493 36. Strong MJ, Xu G, Morici L, Splinter Bon-Durant S, Baddoo M, Lin Z, et al. Microbial  
494 contamination in next generation sequencing: implications for sequence-based analysis of  
495 clinical samples. *PLoS Pathog.* 2014;10(11):e1004437.
- 496 37. Koren O, Spor A, Felin J, Fak F, Stombaugh J, Tremaroli V, et al. Human oral, gut, and  
497 plaque microbiota in patients with atherosclerosis. *Proc Natl Acad Sci U S A.* 2011;108 Suppl  
498 1:4592-8.

- 499 38. Consortium GT. Human genomics. The Genotype-Tissue Expression (GTEx) pilot  
500 analysis: multitissue gene regulation in humans. *Science*. 2015;348(6235):648-60.
- 501 39. Schizophrenia Working Group of the Psychiatric Genomics Consortium. Biological  
502 insights from 108 schizophrenia-associated genetic loci. *Nature*. 2014;511:421--7
- 503 .
- 504 40. Jost L. Partitioning diversity into independent alpha and beta components. *Ecology*.  
505 2007;88(10):2427-39.
- 506 41. Horvath S, Levine AJ. HIV-1 Infection Accelerates Age According to the Epigenetic  
507 Clock. *J Infect Dis*. 2015.
- 508 42. Koch S, Larbi A, Derhovanessian E, Ozcelik D, Naumova E, Pawelec G. Multiparameter  
509 flow cytometric analysis of CD4 and CD8 T cell subsets in young and old people. *Immun*  
510 *Ageing*. 2008;5:6.
- 511 43. Croucher NJ, Thomson NR. Studying bacterial transcriptomes using RNA-seq. *Curr Opin*  
512 *Microbiol*. 2010;13(5):619-24.
- 513 44. McClure R, Balasubramanian D, Sun Y, Bobrovskyy M, Sumby P, Genco CA, et al.  
514 Computational analysis of bacterial RNA-Seq data. *Nucleic Acids Res*. 2013;41(14):e140.
- 515 45. Potgieter M, Bester J, Kell DB, Pretorius E. The dormant blood microbiome in chronic,  
516 inflammatory diseases. *FEMS Microbiol Rev*. 2015;39(4):567-91.
- 517 46. Spadoni I, Zagato E, Bertocchi A, Paolinelli R, Hot E, Di Sabatino A, et al. A gut-  
518 vascular barrier controls the systemic dissemination of bacteria. *Science*. 2015;350(6262):830-4.
- 519 47. Hou S, Makarova KS, Saw JH, Senin P, Ly BV, Zhou Z, et al. Complete genome  
520 sequence of the extremely acidophilic methanotroph isolate V4, *Methylophilum inferorum*,  
521 a representative of the bacterial phylum Verrucomicrobia. *Biol Direct*. 2008;3:26.
- 522 48. Fellerhoff B, Laumbacher B, Mueller N, Gu S, Wank R. Associations between  
523 *Chlamydomonas* infections, schizophrenia and risk of HLA-A10. *Mol Psychiatry*. 2007;12(3):264-  
524 72.
- 525 49. Jorth P, Turner KH, Gumus P, Nizam N, Buduneli N, Whiteley M. Metatranscriptomics of the  
526 human oral microbiome during health and disease. *MBio*. 2014;5(2):e01012-14.
- 527 50. Kostic AD, Ojesina AI, Pedamallu CS, Jung J, Verhaak RG, Getz G, et al. PathSeq:  
528 software to identify or discover microbes by deep sequencing of human tissue. *Nat Biotechnol*.  
529 2011;29(5):393-6.
- 530 51. Ben-Amor K, Heilig H, Smidt H, Vaughan EE, Abee T, de Vos WM. Genetic diversity of  
531 viable, injured, and dead fecal bacteria assessed by fluorescence-activated cell sorting and 16S  
532 rRNA gene analysis. *Applied and environmental microbiology*. 2005;71(8):4679-89.
- 533 52. Ripke S, O'Dushlaine C, Chambert K, Moran JL, Kahler AK, Akterin S, et al. Genome-  
534 wide association analysis identifies 13 new risk loci for schizophrenia. *Nat Genet*.  
535 2013;45(10):1150-9.
- 536 53. Bulik-Sullivan B, Finucane HK, Anttila V, Gusev A, Day FR, Loh PR, et al. An atlas of  
537 genetic correlations across human diseases and traits. *Nature genetics*. 2015;47(11):1236-41.
- 538 54. Belkaid Y, Hand TW. Role of the microbiota in immunity and inflammation. *Cell*.  
539 2014;157(1):121-41.
- 540 55. Edgar R, Domrachev M, Lash AE. Gene Expression Omnibus: NCBI gene expression  
541 and hybridization array data repository. *Nucleic Acids Res*. 2002;30(1):207-10.

542

543





545 **Figure Legends**

546

547 **Figure 1.** Microbial profiling using RNA-Seq data from whole blood. (A) We analyzed a cohort of  
548 192 individuals from four subject groups, i.e. Schizophrenia (SCZ, n=48), amyotrophic lateral  
549 sclerosis (ALS n=47), bipolar disorder (BPD n=48), unaffected control subjects (Controls n=49).  
550 (B) Peripheral blood was collected for RNA collection. (B) RNA-Seq libraries were prepared from  
551 total RNA using ribo-depletion protocol. Reads that failed to map to the human reference  
552 genome and transcriptome were sub-sampled and further filtered to exclude low-quality, low  
553 complexity, and remaining potentially human reads. High quality, unique, non-host reads were  
554 used to determine the taxonomic composition and diversity of the detected microbiome. See  
555 also Table S1.

556

557 **Figure 2.** Relative abundances of microbial taxa at phylum level. Phylogenetic classification is  
558 performed using PhyloSift, which is able to assign the filtered candidate microbial reads to the  
559 microbial genes from 23 distinct taxa on the phylum level.

560

561 **Figure 3.** Increased diversity of microbiome detected in blood in schizophrenia samples. (A)  
562 Alpha diversity per sample for four subject groups (Controls, ALS, BPD, SCZ), measured using  
563 the inverse Simpson index on the phylum level of classification. Schizophrenia samples show  
564 increased diversity compared to all three other groups (ANCOVA  $P < 0.005$  for all groups, after  
565 adjustment of covariates, see also Methods, Table S5 and Figure S3). (B) Alpha diversity per  
566 sample of schizophrenia cases and controls, measured using the inverse Simpson index on the

567 genus level of classification. Schizophrenia samples show increased within-subject diversity  
568 compared to Controls (P = 0.003 after adjustment of covariates).  
569
